# Supplementary material
Source: PubMed Central journal article supplement (PMC2675137)
Supplement: NIHMS4377-supplement-suppl_1.pdf [file NIHMS4377-supplement-suppl_1.pdf]

Supplementary Table 1.  
Primer Sequences

| SNP        | Polymerase chain reaction primer 1 sequence | Polymerase chain reaction primer 2 sequence | Extension primer sequence     |
|------------|---------------------------------------------|---------------------------------------------|-------------------------------|
| rs12948909 | ACGTTGGATGATTAACCATCCCTCCAGGC               | ACGTTGGATGTTCTGGATCTAAAAGAGCCC              | GAGCCCTACTCTCCAC              |
| rs991804   | ACGTTGGATGAGGCTAGGTGAGAAACAAAGG             | ACGTTGGATGTTGAGTCAATTGGAGCCAAC              | AGCCAGTCTGGTAAAC              |
| rs921720   | ACGTTGGATGTGGAAAACCTCAGTGTCTCC              | ACGTTGGATGGCAAGGCACTAAGCTACAG               | ACACACCATAGCTCCAC             |
| rs11265519 | ACGTTGGATGGCCCATGATAAGCACATTAC              | ACGTTGGATGAAGTTTGC GGCTTGGCATC              | GCATCCCTTTTGGAGTG             |
| rs2476601  | ACGTTGGATGAACTGTACTCACCAGCTTCC              | ACGTTGGATGAGATGATGAAATCCCCCTC               | gCCCTCCACTTCTGTAC             |
| rs7749278  | ACGTTGGATGCCCTGGAAGTTAGAATTGAG              | ACGTTGGATGACAGGCATCAAGGTGAAAGG              | GCTGCCTTCAACCACTCA            |
| rs11584383 | ACGTTGGATGCCTAACCCAGATGTGCATAG              | ACGTTGGATGCCAGTCAATTCTTGGCCTTC              | ttGGGTAGAGCCACTTGC            |
| rs7746082  | ACGTTGGATGGATGACAGTTTTGTATTTTG              | ACGTTGGATGGAGTATGACTGCTTCTCTG               | CTGCTTCTCTGAGGCCATC           |
| rs743479   | ACGTTGGATGACACCATTGTCCCTCATCTC              | ACGTTGGATGCTGGGGAGTGCCATTGTAG               | GTGCCATTGTAGAGCACAC           |
| rs3764147  | ACGTTGGATGGGTATTAGACTCATCATTCC              | ACGTTGGATGCATCATAAGAGTCAGGCTCC              | CTTTCTCCATAATCCAGAC           |
| rs17309827 | ACGTTGGATGCTCTTGCATGTGAGCGTTTG              | ACGTTGGATGTTCACTCAAAGGCTTGCCC               | aaaatGCTTGCCAGGTCATG          |
| rs7927894  | ACGTTGGATGCTTGACCCAGATTTCTGAG               | ACGTTGGATGAGGAGGGAGGAGGATAGAGT              | tAGGAGGATAGAGTTTTGAATC        |
| rs2872507  | ACGTTGGATGGCTCTATGCCAGAGTAAAT               | ACGTTGGATGTTTACCAGTACTGCTTATG               | ccccCTGCTTATGTATCTGCCA        |
| rs1551398  | ACGTTGGATGATGGTTGCACCGTGTGGTGT              | ACGTTGGATGCTAAAAGCCTGAGCTCCAC               | gttgTCACTTCCAGCCGCTGTA        |
| rs780094   | ACGTTGGATGGGTGACTTATTCTGCTCCAG              | ACGTTGGATGCCGGCCTCAACAAATGTATT              | AACAAATGTATTGATCAGCAAAC       |
| rs3936503  | ACGTTGGATGATGGGTGCAATAGTGGGAGC              | ACGTTGGATGTTGGGTTAAAGCACAGACCA              | cGACCAAATGCTGTATGTAAGAA       |
| rs12529198 | ACGTTGGATGCTACACTAGTACTCTCATGG              | ACGTTGGATGTTGGAGCCCTGAAGATTTG               | GAGGTTAAATAAGTAAAGGTCACC      |
| rs7758080  | ACGTTGGATGCTGAGTCTCTCAAACACC                | ACGTTGGATGGTCTCATGACATGCTCTCTC              | gtgcCATGCTCTCTCTTTTTCTCCC     |
| rs8098673  | ACGTTGGATGAAGTTCAAAGGACTTCGCC               | ACGTTGGATGGCTATCCAGTAAAAAAGGG               | attgAGAAATCCTCTCACTTGTATC     |
| rs1456893  | ACGTTGGATGTAGGATGACATGTGCCTCTG              | ACGTTGGATGTGCCATGACTAGCTTCTAGG              | CTAGGTAAATTTGATTCCTGAATTC     |
| rs9562532  | ACGTTGGATGGGAGTTGTGTGAATGTTAGC              | ACGTTGGATGCCTCAAATCGCATTTCATCC              | ttccATTGATGAAACACAGTCAGATC    |
| rs7849191  | ACGTTGGATGGGCATTGCGAGTTTAAGGAG              | ACGTTGGATGGTTGACTAGTCACTTCTCTG              | ggtaCTGACTGGTCTTCTGCTTCTAC    |
| rs744166   | ACGTTGGATGTGGCTGTAATGTCTTGAGGG              | ACGTTGGATGACATTGAGAGGGCAATTGGG              | taTGTGTTGTTCTATAAATTAAGTCAA   |
| rs17582416 | ACGTTGGATGCCGGCCCTTACTCATGTC                | ACGTTGGATGACAGGACTTCAAGATGAATTAC            | cgatTTCAAGATGAATTACATGTAGAG   |
| rs10045431 | ACGTTGGATGTTGGCCTGAGGGCAGGCACA              | ACGTTGGATGGGCCAAGGCATCAATTTGAG              | gggAGGCATCAATTTGAGAGTTAATG    |
| rs916977   | ACGTTGGATGTTCTGTTCTTCTGACCCCG               | ACGTTGGATGGGTGTGGGATTTGTTTTGGC              | ggaccGTGGGATGCAGTTTGGAGTAGAC  |
| rs2297909  | ACGTTGGATGGGCAGCAGGGAGAAAAGAG               | ACGTTGGATGAACCTGGGCCCTTCTGTGTG              | ctggGTGGCTCCAGGCCACCCTGCTCACC |
| rs2274910  | ACGTTGGATGATCTGTAGAGAGAACCAGCC              | ACGTTGGATGTAGGGCTTCTTGTGCATGG               | TTGTATGGGGCTGAA               |
| rs1456896  | ACGTTGGATGACCTATCTTCTAGTGTGTC               | ACGTTGGATGAGTCTGCAGAGAGGACAGAG              | GAGGACAGAGGCTGAC              |
| rs2024092  | ACGTTGGATGACCAGCTGTGACCTGTCCC               | ACGTTGGATGAGTCTCGAAGCCTGCAAAC               | aGAACAGCTGGAAGGGA             |
| rs4807569  | ACGTTGGATGAATGTGAAGCTTCAGGGAGG              | ACGTTGGATGTTTCCACTTCTCCCCTCTGC              | AACCCCGTTTTGTATAC             |
| rs2305480  | ACGTTGGATGCCCCAGCAGCATAAAAAGG               | ACGTTGGATGTATCTGAGGCTCTGATTTCC              | GAGTACACATGGAGGACC            |
| rs11564144 | ACGTTGGATGCCATATTCTCCTAAGCACTC              | ACGTTGGATGCAGCTAGACTAAAGCTGAAA              | AGGAACATTGGAGAGGAAG           |
| rs917997   | ACGTTGGATGAGCTAAGGTCAAACGCTGG               | ACGTTGGATGCTCAGACTTCTTTTGGCCAC              | TAATGCTAGAACCAAGCTATC         |
| rs10188217 | ACGTTGGATGCCTCTCTCTTCTGACAAC                | ACGTTGGATGGAAGAAGGGAACCAAAGATG              | cgacCCAAAGATGAGCCAGGC         |
| rs11175593 | ACGTTGGATGGGCAATATGCTTTAGGATTC              | ACGTTGGATGAGGGAGCCAAATTCATTC                | CCCAAATTCATTCACCTAAAC         |
| rs762421   | ACGTTGGATGCTCTGGAAGTTGGATCTTTC              | ACGTTGGATGGAATACACATTCACACACCC              | tttCACACCCACAAAAATCAAA        |
| rs10758669 | ACGTTGGATGTTGGTTGGCTATGGCAAAGA              | ACGTTGGATGGTAGAGACAAGGACATGCTG              | gaaAAGGACATGCTGAAGTACC        |
| rs6908425  | ACGTTGGATGTACCAAGCTCCATCAAGCTG              | ACGTTGGATGATAGGTGACCCACAAAAG                | AAGAGTGAATATGTATGGCTTAC       |
| rs2301436  | ACGTTGGATGCTGCATGTCTGGGTAATGGA              | ACGTTGGATGATCAGCTCACCTCTTTTAG               | gCCTTCTACTGTATTTTTTTCA        |
| rs4959830  | ACGTTGGATGCTGTCCATTTACTATGTGGT              | ACGTTGGATGGTACCCAGCTTTCACAGATT              | TCACAGATTTTTTAAAGTGGAGGC      |

| <b>SNP</b> | <b>Polymerase chain reaction primer 1<br/>sequence</b> | <b>Polymerase chain reaction primer 2<br/>sequence</b> | <b>Extension primer sequence</b> |
|------------|--------------------------------------------------------|--------------------------------------------------------|----------------------------------|
| rs3763313  | ACGTTGGATGCTCAGGAGCAATGTCAAGTC                         | ACGTTGGATGTACCCCTGTCCATAAAATC                          | CCCATAAAATCTTACTAGCAGTAGG        |
| rs1736135  | ACGTTGGATGGGGCAATCCTATCTATTGG                          | ACGTTGGATGGATGCTTAATAGAAAATGGG                         | ggaagGGGATCTATAACACTGGAGA        |
| rs9286879  | ACGTTGGATGAAACATCCTTCCTCTTCCC                          | ACGTTGGATGCCAGGCTCTAGAAAATCAGG                         | GGGAGGAATGAAAATAGAAGCATATA       |
| rs1736020  | ACGTTGGATGGCCAAAATTAAGCGTGGTC                          | ACGTTGGATGAGTCACTCATCATCAGCACC                         | acagaTTCCTTGAAAAGTTATGAAATC      |

---
