# Supplementary material
Source: PubMed Central journal article supplement (PMC2675137)
Supplement: NIHMS4377-supplement-suppl_2.pdf [file NIHMS4377-supplement-suppl_2.pdf]

Supplementary Table 2.  
Association Results for All 45 Genotyped SNPs

| Chr   | SNP        | POS       | A1 | A2 | Frequency A1<br>(cases) | Frequency A2<br>(controls) | P value               | OR     | L95    | U95    |
|-------|------------|-----------|----|----|-------------------------|----------------------------|-----------------------|--------|--------|--------|
| 1p13  | rs2476601  | 114089610 | A  | G  | 0.0955                  | 0.0975                     | .7426                 | 0.9778 | 0.8557 | 1.1170 |
| 1q23  | rs2274910  | 157665119 | T  | C  | 0.3089                  | 0.3252                     | .0790                 | 0.9271 | 0.8514 | 1.0100 |
| 1q23  | rs11265519 | 157691986 | C  | A  | 0.3211                  | 0.3382                     | .0436                 | 0.9254 | 0.8582 | 0.9979 |
| 1q24  | rs9286879  | 169593891 | G  | A  | 0.2431                  | 0.2454                     | .8002                 | 0.9880 | 0.9003 | 1.0840 |
| 1q32  | rs11584383 | 197667523 | C  | T  | 0.2762                  | 0.3177                     | $5.71 \times 10^{-7}$ | 0.8195 | 0.7580 | 0.8860 |
| 1q32  | rs2297909  | 197691964 | A  | G  | 0.2800                  | 0.3304                     | $4.13 \times 10^{-8}$ | 0.7880 | 0.7228 | 0.8591 |
| 2p23  | rs780094   | 27652888  | T  | C  | 0.3985                  | 0.3818                     | .0590                 | 1.0730 | 0.9976 | 1.1540 |
| 2p16  | rs10188217 | 61129193  | T  | C  | 0.4624                  | 0.4932                     | .0024                 | 0.8838 | 0.8164 | 0.9568 |
| 2q11  | rs917997   | 102529086 | T  | C  | 0.2424                  | 0.2150                     | .0013                 | 1.1680 | 1.0630 | 1.2840 |
| 5q33  | rs10045431 | 158747111 | A  | C  | 0.2641                  | 0.2956                     | $5.21 \times 10^{-4}$ | 0.8552 | 0.7827 | 0.9345 |
| 6p25  | rs17309827 | 3378317   | G  | T  | 0.3689                  | 0.3722                     | .7070                 | 0.9861 | 0.9164 | 1.0610 |
| 6p25  | rs4959830  | 3379241   | A  | G  | 0.3714                  | 0.3717                     | .9679                 | 0.9985 | 0.9275 | 1.0750 |
| 6p25  | rs12529198 | 5096246   | G  | A  | 0.0698                  | 0.0534                     | $1.10 \times 10^{-4}$ | 1.3300 | 1.1490 | 1.5390 |
| 6p22  | rs6908425  | 20836710  | T  | C  | 0.1997                  | 0.2277                     | $1.89 \times 10^{-4}$ | 0.8463 | 0.7755 | 0.9235 |
| 6p21  | rs3763313  | 32484449  | C  | A  | 0.2179                  | 0.1870                     | $1.41 \times 10^{-4}$ | 1.2110 | 1.0970 | 1.3360 |
| 6q21  | rs7746082  | 106541962 | C  | G  | 0.2856                  | 0.2884                     | .7344                 | 0.9867 | 0.9120 | 1.0670 |
| 6q25  | rs7758080  | 149618772 | G  | A  | 0.2758                  | 0.2569                     | .0352                 | 1.1020 | 1.0070 | 1.2060 |
| 6q27  | rs7749278  | 167405736 | C  | T  | 0.4815                  | 0.4745                     | .4382                 | 1.0280 | 0.9581 | 1.1040 |
| 6q27  | rs2301436  | 167408399 | T  | C  | 0.4800                  | 0.4715                     | .3998                 | 1.0340 | 0.9559 | 1.1190 |
| 7p12  | rs1456893  | 50046933  | G  | A  | 0.3017                  | 0.3225                     | .0130                 | 0.9078 | 0.8406 | 0.9803 |
| 7p12  | rs1456896  | 50081722  | C  | T  | 0.3061                  | 0.3325                     | .0045                 | 0.8856 | 0.8136 | 0.9639 |
| 8q24  | rs921720   | 126603853 | A  | G  | 0.3710                  | 0.3923                     | .0155                 | 0.9139 | 0.8495 | 0.9831 |
| 8q24  | rs1551398  | 126609233 | G  | A  | 0.3700                  | 0.3907                     | .0334                 | 0.9158 | 0.8443 | 0.9933 |
| 9p24  | rs10758669 | 4971602   | C  | A  | 0.3797                  | 0.3364                     | $1.02 \times 10^{-5}$ | 1.2070 | 1.1120 | 1.3110 |
| 9p24  | rs7849191  | 4978761   | T  | C  | 0.3652                  | 0.3968                     | .0015                 | 0.8748 | 0.8062 | 0.9493 |
| 10p11 | rs17582416 | 35327656  | G  | T  | 0.3659                  | 0.3355                     | $4.27 \times 10^{-4}$ | 1.1430 | 1.0610 | 1.2320 |
| 10p11 | rs3936503  | 35589263  | A  | G  | 0.3372                  | 0.3073                     | $4.13 \times 10^{-4}$ | 1.1460 | 1.0630 | 1.2370 |
| 11q13 | rs7927894  | 75978964  | T  | C  | 0.4195                  | 0.3921                     | .0019                 | 1.1210 | 1.0420 | 1.2050 |
| 12q12 | rs11175593 | 38888207  | T  | C  | 0.0185                  | 0.0142                     | .0541                 | 1.3130 | 0.9949 | 1.7320 |

| Chr   | SNP        | POS      | A1 | A2 | Frequency A1<br>(cases) | Frequency A2<br>(controls) | P value               | OR     | L95    | U95    |
|-------|------------|----------|----|----|-------------------------|----------------------------|-----------------------|--------|--------|--------|
| 12q12 | rs11564144 | 39104262 | C  | A  | 0.0231                  | 0.0159                     | .0034                 | 1.4580 | 1.1300 | 1.8820 |
| 13q14 | rs3764147  | 43355925 | G  | A  | 0.2217                  | 0.2097                     | .1075                 | 1.0740 | 0.9846 | 1.1710 |
| 13q14 | rs9562532  | 43497789 | G  | A  | 0.2373                  | 0.2311                     | .4242                 | 1.0350 | 0.9520 | 1.1250 |
| 15q13 | rs916977   | 26186959 | T  | C  | 0.1522                  | 0.1404                     | .0783                 | 1.0990 | 0.9899 | 1.2200 |
| 17q12 | rs991804   | 29611838 | T  | C  | 0.2609                  | 0.2791                     | .0428                 | 0.9120 | 0.8346 | 0.9966 |
| 17q12 | rs2872507  | 35294289 | A  | G  | 0.4899                  | 0.4844                     | .7175                 | 1.0220 | 0.9086 | 1.1500 |
| 17q12 | rs2305480  | 35315722 | A  | G  | 0.4877                  | 0.4819                     | .5738                 | 1.0240 | 0.9440 | 1.1100 |
| 17q21 | rs744166   | 37767727 | G  | A  | 0.3916                  | 0.4385                     | .0014                 | 0.8242 | 0.7310 | 0.9293 |
| 17q21 | rs12948909 | 37824128 | C  | A  | 0.2400                  | 0.2702                     | $1.34 \times 10^{-4}$ | 0.8532 | 0.7862 | 0.9260 |
| 18q11 | rs8098673  | 17927329 | C  | A  | 0.3239                  | 0.3247                     | .9300                 | 0.9962 | 0.9159 | 1.0840 |
| 19p13 | rs4807569  | 1074378  | C  | A  | 0.2181                  | 0.2026                     | .0363                 | 1.0980 | 1.0060 | 1.1980 |
| 19p13 | rs2024092  | 1075031  | A  | G  | 0.2174                  | 0.2022                     | .0659                 | 1.0960 | 0.9943 | 1.2080 |
| 21q21 | rs1736135  | 15727091 | C  | T  | 0.4122                  | 0.4249                     | .1624                 | 0.9494 | 0.8833 | 1.0200 |
| 21q21 | rs1736020  | 15734423 | A  | C  | 0.4080                  | 0.4215                     | .1356                 | 0.9461 | 0.8801 | 1.0170 |
| 21q22 | rs743479   | 44436378 | C  | T  | 0.4175                  | 0.3968                     | .0370                 | 1.0890 | 1.0050 | 1.1800 |
| 21q22 | rs762421   | 44439989 | G  | A  | 0.4145                  | 0.3932                     | .0166                 | 1.0930 | 1.0160 | 1.1750 |

*P* values are those from a Cochran-Armitage trend test. L95 and U95 are the estimated lower and upper 95% confidence bounds of the odds ratio (OR), respectively. Control frequency is the frequency of the minor allele (A1) in our combined control panel. Chr, chromosome.
