# Supplementary material
Source: PubMed Central journal article supplement (PMC2675137)
Supplement: NIHMS4377-supplement-suppl_3.pdf [file NIHMS4377-supplement-suppl_3.pdf]

Supplementary Table 3.  
Results of "Within-Case" Association Analysis of UC Subphenotypes

| SNP                     | Chr   | Gene                                                                | Risk allele | Age at diagnosis | P value                   |                      |                    |                   |           |                  |
|-------------------------|-------|---------------------------------------------------------------------|-------------|------------------|---------------------------|----------------------|--------------------|-------------------|-----------|------------------|
|                         |       |                                                                     |             |                  | Family history of disease | Smoking at diagnosis | Left-sided disease | Extensive disease | Proctitis | Need for surgery |
| rs2476601               | 1p13  | <i>PTPN22</i>                                                       | G           | .2946            | .0974                     | .1274                | .3852              | .9136             | .1611     | .0485            |
| rs9286879               | 1q24  |                                                                     | G           | .3431            | .3411                     | .3602                | .7264              | .1846             | .1916     | .8766            |
| rs2274910               | 1q23  | <i>ITLN2</i>                                                        | C           | .4727            | .4439                     | .0926                | .1182              | .6106             | .2940     | .3299            |
| rs11584383              | 1q32  | <i>KIF21B</i>                                                       | T           | .7753            | .3776                     | .9400                | .6304              | .0826             | .1426     | .0180            |
| rs10188217 <sup>a</sup> | 2p16  | <i>PUS10</i>                                                        | C           | .7927            | .2547                     | .8175                | .6411              | .7336             | .7682     | .6730            |
| rs780094                | 2p23  | <i>GCKR</i>                                                         | T           | .1035            | .2428                     | .0353                | .7772              | .8268             | .4279     | .9486            |
| rs917997                | 2q11  | <i>IL18RAP</i>                                                      | T           | .7353            | .3450                     | .3003                | .7876              | .7012             | .4573     | .0067            |
| rs10045431              | 5q33  | <i>IL12B</i>                                                        | C           | .3151            | .8044                     | .4326                | .7491              | .4312             | .5908     | .3929            |
| rs12529198              | 6p25  | <i>LYRM4</i>                                                        | G           | .0330            | .8672                     | .9536                | .6067              | .5637             | .2241     | .2442            |
| rs6908425               | 6p22  | <i>CDKAL1</i>                                                       | C           | .3350            | .0051                     | .0477                | .0515              | .1821             | .7022     | .3707            |
| rs3763313               | 6p21  | <i>BTNL2</i><br><i>SLC26A3</i><br><i>HLA-DRB1</i><br><i>HLA-DQA</i> | C           | .2077            | .1396                     | .4107                | .7309              | .8911             | .8269     | .5164            |
| rs17309827              | 6p25  | <i>SLC22A23</i>                                                     | T           | .5598            | .4398                     | .0219                | .4661              | .6412             | .7721     | .8033            |
| rs7758080               | 6q25  |                                                                     | G           | .3151            | .4175                     | .0909                | .6838              | .1528             | .1566     | .7857            |
| rs7749278               | 6q27  | <i>CCR6</i>                                                         | T           | .4922            | .1473                     | .4246                | .7346              | .9254             | .8562     | .5684            |
| rs1456893               | 7p12  |                                                                     | A           | .0209            | .4857                     | .0053                | .7290              | .5968             | .8284     | .6810            |
| rs1551398               | 8q24  |                                                                     | A           | .1983            | .9418                     | .9098                | .1603              | .3922             | .6190     | .0420            |
| rs10758669              | 9p24  | <i>JAK2</i>                                                         | C           | .3330            | .1209                     | .7807                | .4405              | .1755             | .4161     | .7548            |
| rs17582416              | 10p11 | <i>CCNY</i>                                                         | G           | .7035            | .7141                     | .6392                | .4780              | .4891             | .8465     | .0914            |
| rs7927894               | 11q13 | <i>C11orf30</i>                                                     | T           | .4900            | .1817                     | .3121                | .8243              | .7370             | .4889     | .2208            |
| rs11175593              | 12q12 | <i>LRRK2, MUC19</i>                                                 | T           | .9522            | .6000                     | .2264                | .4870              | .1935             | .4086     | .9890            |
| rs3764147               | 13q14 |                                                                     | G           | .8563            | .9039                     | .1468                | .2128              | .4879             | .5022     | .4965            |
| rs991804                | 17q12 | <i>CCL2, CCL7</i>                                                   | C           | .8477            | .6023                     | .6117                | .3911              | .0438             | .1623     | .2464            |
| rs2872507 <sup>b</sup>  | 17q12 | <i>ORMDL3</i>                                                       | A           | .2308            | .1967                     | .2918                | .1138              | .4902             | .2918     | NA               |
| rs12948909              | 17q21 | <i>STAT3</i>                                                        | A           | .4053            | .7702                     | .0737                | .9237              | .6193             | .4013     | .3171            |
| rs8098673               | 18q11 |                                                                     | C           | .5927            | .4067                     | .9331                | .6896              | .5333             | .7355     | .8071            |
| rs4807569               | 19p13 |                                                                     | C           | .1968            | .8194                     | .0122                | .9452              | .6839             | .6079     | .8158            |
| rs1736135               | 21q21 |                                                                     | T           | .4649            | .6125                     | .6034                | .5372              | .8726             | .2756     | .7143            |
| rs762421                | 21q22 | <i>ICOSLG</i>                                                       | G           | .8735            | .2649                     | .2687                | .5131              | .3380             | .0237     | .2055            |

Chr, chromosome.
